# Supplementary material for: Preference and effect of gustatory sense on sugar-feeding of fire ants
Source: PeerJ journal article supplement (doi:10.7717/peerj.11943), 2021-08-11
Supplement: Revised_Raw_data.xlsx [file Revised_Raw_data.xlsx]

## Sheet: Figure 1
	figure 1
		Sugar preference
		Glucose	Sucrose	Raffinose	Cellulose	Honey	Water
	Mean	10.625	35.0833	12.5	9.5	15.7917	16.5
	SD	1.09594	3.46306	1.74456	1.28537	5.09884	3.16228
	SE	0.223708	0.706893	0.356106	0.262375	1.0408	0.645497
			C = colony repilications
	100 worker were used
			Glucose	Sucrose	Raffinose	Cellulose	Honey	Water
	C1	1	11	31	16	9	21	12	100
		2	9	33	13	10	22	13	100
		3	12	33	12	8	15	20	100
		4	10	35	11	9	18	17	100
		5	12	30	16	9	21	12	100
		6	9	33	13	10	22	13	100
	C2	1	11	36	12	9	12	20	100
		2	10	32	11	12	18	17	100
		3	12	37	12	8	11	20	100
		4	10	35	11	9	18	17	100
		5	12	35	16	9	16	12	100
		6	9	33	13	10	22	13	100
	C3	1	11	36	12	9	12	20	100
		2	10	32	11	12	18	17	100
		3	12	36	12	8	12	20	100
		4	10	35	11	9	18	17	100
		5	12	39	16	9	12	12	100
		6	9	33	13	10	22	13	100
	C4	1	11	41	12	9	7	20	100
		2	10	32	11	12	18	17	100
		3	11	34	12	9	14	20	100
		4	10	43	11	12	7	17	100
		5	12	43	12	8	5	20	100
		6	10	35	11	9	18	17	100
		Mean	10.625	35.0833	12.5	9.5	15.7917	16.5	100
		SD	1.09594	3.46306	1.74456	1.28537	5.09884	3.16228
		SE	0.223708	0.706893	0.356106	0.262375	1.0408	0.645497
		Treatments	Replications
	Glucose	1	1	11
		1	2	9
		1	3	12
		1	4	10
		1	5	12
		1	6	9
		1	7	11
		1	8	10
		1	9	12
		1	10	10
		1	11	12
		1	12	9
		1	13	11
		1	14	10
		1	15	12
		1	16	10
		1	17	12
		1	18	9
		1	19	11
		1	20	10
		1	21	11
		1	22	10
		1	23	12
		1	24	10
	Sucrose	2	1	31
		2	2	33
		2	3	33
		2	4	35
		2	5	30
		2	6	33
		2	7	36
		2	8	32
		2	9	37
		2	10	35
		2	11	35
		2	12	33
		2	13	36
		2	14	32
		2	15	36
		2	16	35
		2	17	39
		2	18	33
		2	19	41
		2	20	32
		2	21	34
		2	22	43
		2	23	43
		2	24	35
	Raffinose	3	1	16
		3	2	13
		3	3	12
		3	4	11
		3	5	16
		3	6	13
		3	7	12
		3	8	11
		3	9	12
		3	10	11
		3	11	16
		3	12	13
		3	13	12
		3	14	11
		3	15	12
		3	16	11
		3	17	16
		3	18	13
		3	19	12
		3	20	11
		3	21	12
		3	22	11
		3	23	12
		3	24	11
	Cellulose	4	1	9
		4	2	10
		4	3	8
		4	4	9
		4	5	9
		4	6	10
		4	7	9
		4	8	12
		4	9	8
		4	10	9
		4	11	9
		4	12	10
		4	13	9
		4	14	12
		4	15	8
		4	16	9
		4	17	9
		4	18	10
		4	19	9
		4	20	12
		4	21	9
		4	22	12
		4	23	8
		4	24	9
	Honey	5	1	21
		5	2	22
		5	3	15
		5	4	18
		5	5	21
		5	6	22
		5	7	12
		5	8	18
		5	9	11
		5	10	18
		5	11	16
		5	12	22
		5	13	12
		5	14	18
		5	15	12
		5	16	18
		5	17	12
		5	18	22
		5	19	7
		5	20	18
		5	21	14
		5	22	7
		5	23	5
		5	24	18
	Water	6	1	12
		6	2	13
		6	3	20
		6	4	17
		6	5	12
		6	6	13
		6	7	20
		6	8	17
		6	9	20
		6	10	17
		6	11	12
		6	12	13
		6	13	20
		6	14	17
		6	15	20
		6	16	17
		6	17	12
		6	18	13
		6	19	20
		6	20	17
		6	21	20
		6	22	17
		6	23	20
		6	24	17

## Sheet: Table 1
			92
		Feeding				No feeding
		Touch Antennae	Touch forelegs tarsi and movement of antennae	Touch palps (labial and maxillary palps)		Touch antennae, tarsi of foreleg, midleg, hindleg, and sting (no feeding move away)	Use mandibles and forelegs to pull and drag the droplets and after 4-7 minutes movements stops.
	1					1	1
	2	1
	3	1
	4	1
	5		1
	6		1
	7		1
	8		1
	9		1
	10		1
	11		1
	12		1
	13		1
	14	1
	15					1
	16	1
	17		1
	18		1
	19		1			1
	20		1
	21		1			1
	22		1
	23		1
	24		1
	25		1
	26		1
	27		1
	28		1
	29		1
	30		1
	31		1
	32	1
	33		1
	34		1
	35
	36						1
	37						1
	38
	39
	40
	41	1					1
	42					1
	43
	44			1
	45
	46			1
	47
	48					1
	49			1
	50					1
	51	1
	52					1
	53		1
	54		1
	55		1
	56		1
	57		1
	58		1
	59
	60		1
	61
	62		1
	63	1
	64			1
	65			1
	66			1
	67	1
	68	1
	69	1
	70	1
	71	1
	72			1
	73			1
	74			1
	75		1
	76		1
	77		1
	78		1
	79		1
	80		1
	81	1
	82	1
	83
	84
	85
	86	1
	87		1
	88		1
	89		1
	90			1
	91			1
	92			1
	93		1
	94	1
	95	1
	96		1
	97	1
	98	1
	99	1
	100	1
	Sum	23	45	12	80	8	4
	%	28.75	56.25	15		66.6667	33.3333

## Sheet:  Table 2 and 3
			Table 2 and 3
				Locomotor parameters studied according to the five different treatments of RIFA workers:
				N = 20 from each colony and for each treatments) total 4 colonies were used (80)
					Locomotion using ethovision
					Velocity (cm/s)
					ANTE -	ANTE (2-Silicon)	Intact	C1	1	TARSI -	TARSI (2-Silicon)	TARSIHCL	INTACT			Distance moved (cm)											Body rotation (n)													Meander (˚/cm)
			C1	1	0.45	0.189015	1.6		2	0.0708169	0.13	0.38	1.2	C1	1	ANTE -	ANTE (2-Silicon)	TARSI -	TARSI (2-Silicon)	TARSIHCL	INTACT						ANTE -	ANTE (2-Silicon)	INTACT			TARSI -	TARSI (2-Silicon)	TARSIHCL	INTACT					ANTE -	ANTE (2-Silicon)	INTACT			TARSI -	TARSI (2-Silicon)	TARSIHCL	INTACT
				2	0.32	0.21	1.2		3	0.05	0.1	0.34	1.23		2	488.889	282.952	128.387	141.485	476.51	1435						2	3	16			0	0	1	16					17931.7	42031.7	12325.9			208285	83965.7	85067	12325.9
				3	0.34	0.18	1.23		4	0.1	0.12	0.35	1.21		3	455.34	256.43	120.32	160.32	432.32	1465.76						3	3	19			0	0	2	17					17912.6	42060	12398			208246	83955.6	85087	12398
				4	0.4	0.16	1.21		5	0.09	0.09	0.33	1.4		4	447.32	248.87	90.53	121.32	410.67	1487.32						4	2	21			0	0	1	18					17987.9	42088.9	11111			208268	83920.3	85065.3	12346
				5	0.41	0.2	1.4		6	0.06	0.14	0.31	1.3		5	510.32	310.23	80.43	154	400.43	1455.54						5	1	19			0	0	1	19					17934	42067.4	12367			208270	83954.7	85044	12367
				6	0.45	0.189015	1.3		7	0.0708169	0.13	0.38	1.2		6	512.56	232.32	112.32	145.54	410.45	1434.25						3	4	15			0	0	2	15					17910.9	42055.6	12321			208234	83956.3	85054.5	12321
				7	0.32	0.21	1.2		8	0.05	0.1	0.34	1.23		7	488.889	282.952	128.387	141.485	476.51	1435						2	3	16			0	0	1	16					17931.7	42031.7	12325.9			208285	83965.7	85067	12325.9
				8	0.45	0.189015	1.23		9	0.0708169	0.13	0.38	1.2		8	455.34	256.43	120.32	160.32	432.32	1465.76						3	3	17			0	0	2	17					17912.6	42060	12398			208246	83955.6	85087	12398
				9	0.32	0.21	1.2		10	0.05	0.1	0.34	1.23		9	488.889	282.952	128.387	141.485	476.51	1435						2	3	16			0	0	1	16					17931.7	42031.7	12325.9			208285	83965.7	85067	12325.9
				10	0.34	0.18	1.23		11	0.1	0.12	0.35	1.21		10	455.34	256.43	120.32	160.32	432.32	1465.76						3	3	17			0	0	2	17					17912.6	42060	12398			208246	83955.6	85087	12398
				11	0.45	0.189015	1.21		12	0.0708169	0.13	0.38	1.2		11	447.32	248.87	90.53	121.32	410.67	1487.32						4	2	18			0	0	1	18					17987.9	42088.9	12346			208268	83920.3	85065.3	12346
				12	0.32	0.21	1.2		13	0.05	0.1	0.34	1.23		12	488.889	282.952	128.387	141.485	476.51	1435						2	3	16			0	0	1	16					17931.7	42031.7	12325.9			208285	83965.7	85067	12325.9
				13	0.34	0.18	1.23		14	0.1	0.12	0.35	1.21		13	455.34	256.43	120.32	160.32	432.32	1465.76						3	3	17			0	0	2	17					17912.6	42060	12398			208246	83955.6	85087	12398
				14	0.4	0.16	1.21		15	0.09	0.09	0.33	1.4		14	447.32	248.87	90.53	121.32	410.67	1487.32						4	2	18			0	0	1	18					17987.9	42088.9	12346			208268	83920.3	85065.3	12346
				15	0.41	0.2	1.4		16	0.06	0.14	0.31	1.3		15	510.32	310.23	80.43	154	400.43	1455.54						5	1	19			0	0	1	19					17934	42067.4	12367			208270	83954.7	85044	12367
				16	0.45	0.189015	1.3		17	0.0708169	0.13	0.38	1.2		16	512.56	232.32	112.32	145.54	410.45	1434.25						3	4	15			0	0	2	15					17910.9	42055.6	12321			208234	83956.3	85054.5	12321
				17	0.32	0.21	1.2		18	0.05	0.1	0.34	1.23		17	488.889	282.952	128.387	141.485	476.51	1435						2	3	16			0	0	1	16					17931.7	42031.7	12325.9			208285	83965.7	85067	12325.9
				18	0.34	0.18	1.23		19	0.1	0.12	0.35	1.21		18	455.34	256.43	120.32	160.32	432.32	1465.76						3	3	17			0	0	2	17					17912.6	42060	12398			208246	83955.6	85087	12398
				19	0.4	0.16	1.21		20	0.09	0.09	0.33	1.4		19	447.32	248.87	90.53	121.32	410.67	1487.32						4	2	18			0	0	1	18					17987.9	42088.9	12346			208268	83920.3	85065.3	12346
				20	0.41	0.2	1.4	C2	1	0.06	0.14	0.31	1.3		20	510.32	310.23	80.43	154	400.43	1455.54						5	1	19			0	0	1	19					17934	42067.4	12367			208270	83954.7	85044	12367
			C2	1	0.45	0.189015	1.3		2	0.0708169	0.13	0.38	1.2	C2	1	512.56	232.32	112.32	145.54	410.45	1434.25						3	4	15			0	0	2	15					17910.9	42055.6	12321			208234	83956.3	85054.5	12321
				2	0.32	0.21	1.2		3	0.05	0.1	0.34	1.23		2	488.889	282.952	128.387	141.485	476.51	1435						2	3	16			0	0	1	16					17931.7	42031.7	12325.9			208285	83965.7	85067	12325.9
				3	0.45	0.189015	1.23		4	0.0708169	0.13	0.38	1.2		3	455.34	256.43	120.32	160.32	432.32	1465.76						3	3	17			0	0	2	17					17912.6	42060	12398			208246	83955.6	85087	12398
				4	0.32	0.21	1.2		5	0.05	0.1	0.34	1.23		4	488.889	282.952	128.387	141.485	476.51	1435						2	3	16			0	0	1	16					17931.7	42031.7	12325.9			208285	83965.7	85067	12325.9
				5	0.34	0.18	1.23		6	0.1	0.12	0.35	1.21		5	455.34	256.43	120.32	160.32	432.32	1465.76						3	3	17			0	0	2	17					17912.6	42060	12398			208246	83955.6	85087	12398
				6	0.45	0.189015	1.21		7	0.0708169	0.13	0.38	1.2		6	447.32	248.87	90.53	121.32	410.67	1487.32						4	2	18			0	0	1	18					17987.9	42088.9	12346			208268	83920.3	85065.3	12346
				7	0.32	0.21	1.2		8	0.05	0.1	0.34	1.23		7	488.889	282.952	128.387	141.485	476.51	1435						2	3	16			0	0	1	16					17931.7	42031.7	12325.9			208285	83965.7	85067	12325.9
				8	0.34	0.18	1.23		9	0.1	0.12	0.35	1.21		8	455.34	256.43	120.32	160.32	432.32	1465.76						3	3	17			0	0	2	17					17912.6	42060	12398			208246	83955.6	85087	12398
				9	0.32	0.21	1.21		10	0.05	0.1	0.34	1.23		9	447.32	248.87	90.53	121.32	410.67	1487.32						4	2	18			0	0	1	18					17987.9	42088.9	12346			208268	83920.3	85065.3	12346
				10	0.45	0.189015	1.23		11	0.0708169	0.13	0.38	1.2		10	455.34	256.43	120.32	160.32	432.32	1465.76						3	3	17			0	0	2	17					17912.6	42060	12398			208246	83955.6	85087	12398
				11	0.32	0.21	1.2		12	0.05	0.1	0.34	1.23		11	488.889	282.952	128.387	141.485	476.51	1435						2	3	16			0	0	1	16					17931.7	42031.7	12325.9			208285	83965.7	85067	12325.9
				12	0.34	0.18	1.23		13	0.1	0.12	0.35	1.21		12	455.34	256.43	120.32	160.32	432.32	1465.76						3	3	17			0	0	2	17					17912.6	42060	12398			208246	83955.6	85087	12398
				13	0.45	0.189015	1.21		14	0.0708169	0.13	0.38	1.2		13	447.32	248.87	90.53	121.32	410.67	1487.32						4	2	18			0	0	1	18					17987.9	42088.9	12346			208268	83920.3	85065.3	12346
				14	0.32	0.21	1.2		15	0.05	0.1	0.34	1.23		14	488.889	282.952	128.387	141.485	476.51	1435						2	3	16			0	0	1	16					17931.7	42031.7	12325.9			208285	83965.7	85067	12325.9
				15	0.34	0.18	1.23		16	0.1	0.12	0.35	1.21		15	455.34	256.43	120.32	160.32	432.32	1465.76						3	3	17			0	0	2	17					17912.6	42060	12398			208246	83955.6	85087	12398
				16	0.4	0.16	1.21		17	0.09	0.09	0.33	1.4		16	447.32	248.87	90.53	121.32	410.67	1487.32						4	2	18			0	0	1	18					17987.9	42088.9	12346			208268	83920.3	85065.3	12346
				17	0.41	0.2	1.4		18	0.06	0.14	0.31	1.3		17	510.32	310.23	80.43	154	400.43	1455.54						5	1	19			0	0	1	19					17934	42067.4	12367			208270	83954.7	85044	12367
				18	0.45	0.189015	1.3		19	0.0708169	0.13	0.38	1.2		18	512.56	232.32	112.32	145.54	410.45	1434.25						3	4	15			0	0	2	15					17910.9	42055.6	12321			208234	83956.3	85054.5	12321
				19	0.32	0.21	1.2		20	0.05	0.1	0.34	1.23		19	488.889	282.952	128.387	141.485	476.51	1435						2	3	16			0	0	1	16					17931.7	42031.7	12325.9			208285	83965.7	85067	12325.9
				20	0.34	0.18	1.23	C3	1	0.1	0.12	0.35	1.21		20	455.34	256.43	120.32	160.32	432.32	1465.76						3	3	17			0	0	2	17					17912.6	42060	12398			208246	83955.6	85087	12398
			C3	1	0.4	0.16	1.21		2	0.09	0.09	0.33	1.4	C3	1	447.32	248.87	90.53	121.32	410.67	1487.32						4	2	18			0	0	1	18					17987.9	42088.9	12346			208268	83920.3	85065.3	12346
				2	0.41	0.2	1.4		3	0.06	0.14	0.31	1.3		2	510.32	310.23	80.43	154	400.43	1455.54						5	1	19			0	0	1	19					17934	42067.4	12367			208270	83954.7	85044	12367
				3	0.45	0.189015	1.3		4	0.0708169	0.13	0.38	1.2		3	512.56	232.32	112.32	145.54	410.45	1434.25						3	4	15			0	0	2	15					17910.9	42055.6	12432			208234	83956.3	85054.5	12432
				4	0.32	0.21	1.2		5	0.05	0.1	0.34	1.23		4	488.889	282.952	128.387	141.485	476.51	1435						2	3	16			0	0	1	16					17931.7	42031.7	12325.9			208285	83965.7	85067	12325.9
				5	0.45	0.189015	1.23		6	0.0708169	0.13	0.38	1.2		5	455.34	256.43	120.32	160.32	432.32	1465.76						3	3	17			0	0	2	17					17912.6	42060	12398			208246	83955.6	85087	12398
				6	0.32	0.21	1.2		7	0.05	0.1	0.34	1.23		6	488.889	282.952	128.387	141.485	476.51	1435						2	3	16			0	0	1	16					17931.7	42031.7	12325.9			208285	83965.7	85067	12325.9
				7	0.34	0.18	1.23		8	0.1	0.12	0.35	1.21		7	455.34	256.43	120.32	160.32	432.32	1465.76						3	3	17			0	0	2	17					17912.6	42060	12398			208246	83955.6	85087	12398
				8	0.45	0.189015	1.21		9	0.0708169	0.13	0.38	1.2		8	447.32	248.87	90.53	121.32	410.67	1487.32						4	2	18			0	0	1	18					17987.9	42088.9	12346			208268	83920.3	85065.3	12346
				9	0.32	0.21	1.2		10	0.05	0.1	0.34	1.23		9	488.889	282.952	128.387	141.485	476.51	1435						2	3	16			0	0	1	16					17931.7	42031.7	12325.9			208285	83965.7	85067	12325.9
				10	0.34	0.18	1.23		11	0.1	0.12	0.35	1.21		10	455.34	256.43	120.32	160.32	432.32	1465.76						3	3	17			0	0	2	17					17912.6	42060	12398			208246	83955.6	85087	12398
				11	0.4	0.16	1.21		12	0.09	0.09	0.33	1.4		11	447.32	248.87	90.53	121.32	410.67	1487.32						4	2	18			0	0	1	18					17987.9	42088.9	12346			208268	83920.3	85065.3	12346
				12	0.41	0.2	1.4		13	0.06	0.14	0.31	1.3		12	510.32	310.23	80.43	154	400.43	1455.54						5	1	19			0	0	1	19					17934	42067.4	12367			208270	83954.7	85044	12367
				13	0.45	0.189015	1.3		14	0.0708169	0.13	0.38	1.2		13	512.56	232.32	112.32	145.54	410.45	1434.25						3	4	15			0	0	2	15					17910.9	42055.6	12343			208234	83956.3	85054.5	12343
				14	0.32	0.21	1.2		15	0.05	0.1	0.34	1.23		14	488.889	282.952	128.387	141.485	476.51	1435						2	3	16			0	0	1	16					17931.7	42031.7	12325.9			208285	83965.7	85067	12325.9
				15	0.34	0.18	1.23		16	0.1	0.12	0.35	1.21		15	455.34	256.43	120.32	160.32	432.32	1465.76						3	3	17			0	0	2	17					17912.6	42060	12398			208246	83955.6	85087	12398
				16	0.4	0.16	1.21		17	0.09	0.09	0.33	1.4		16	447.32	248.87	90.53	121.32	410.67	1487.32						4	2	18			0	0	1	18					17987.9	42088.9	12346			208268	83920.3	85065.3	12346
				17	0.32	0.21	1.4		18	0.05	0.1	0.34	1.23		17	510.32	310.23	80.43	154	400.43	1455.54						5	1	19			0	0	1	19					17934	42067.4	12367			208270	83954.7	85044	12367
				18	0.45	0.189015	1.23		19	0.0708169	0.13	0.38	1.2		18	455.34	256.43	120.32	160.32	432.32	1465.76						3	3	17			0	0	2	17					17912.6	42060	12398			208246	83955.6	85087	12398
				19	0.32	0.21	1.2		20	0.05	0.1	0.34	1.23		19	488.889	282.952	128.387	141.485	476.51	1435						2	3	16			0	0	1	16					17931.7	42031.7	12325.9			208285	83965.7	85067	12325.9
				20	0.34	0.18	1.23	C4	1	0.1	0.12	0.35	1.21		20	455.34	256.43	120.32	160.32	432.32	1465.76						3	3	17			0	0	2	17					17912.6	42060	12398			208246	83955.6	85087	12398
			C4	1	0.45	0.189015	1.21		2	0.0708169	0.13	0.38	1.2	C4	1	447.32	248.87	90.53	121.32	410.67	1487.32						4	2	18			0	0	1	18					17987.9	42088.9	12346			208268	83920.3	85065.3	12346
				2	0.32	0.21	1.2		3	0.05	0.1	0.34	1.23		2	488.889	282.952	128.387	141.485	476.51	1435						2	3	16			0	0	1	16					17931.7	42031.7	12325.9			208285	83965.7	85067	12325.9
				3	0.34	0.18	1.23		4	0.1	0.12	0.35	1.21		3	455.34	256.43	120.32	160.32	432.32	1465.76						3	3	17			0	0	2	17					17912.6	42060	12398			208246	83955.6	85087	12398
				4	0.4	0.16	1.21		5	0.09	0.09	0.33	1.4		4	447.32	248.87	90.53	121.32	410.67	1487.32						4	2	18			0	0	1	18					17987.9	42088.9	12346			208268	83920.3	85065.3	12346
				5	0.41	0.2	1.4		6	0.06	0.14	0.31	1.3		5	510.32	310.23	80.43	154	400.43	1455.54						5	1	19			0	0	1	19					17934	42067.4	12367			208270	83954.7	85044	12367
				6	0.45	0.189015	1.3		7	0.0708169	0.13	0.38	1.2		6	512.56	232.32	112.32	145.54	410.45	1434.25						3	4	15			0	0	2	15					17910.9	42055.6	12324			208234	83956.3	85054.5	12324
				7	0.32	0.21	1.2		8	0.05	0.1	0.34	1.23		7	488.889	282.952	128.387	141.485	476.51	1435						2	3	16			0	0	1	16					17931.7	42031.7	12325.9			208285	83965.7	85067	12325.9
				8	0.34	0.18	1.23		9	0.1	0.12	0.35	1.21		8	455.34	256.43	120.32	160.32	432.32	1465.76						3	3	17			0	0	2	17					17912.6	42060	12398			208246	83955.6	85087	12398
				9	0.4	0.16	1.21		10	0.09	0.09	0.33	1.4		9	447.32	248.87	90.53	121.32	410.67	1487.32						4	2	18			0	0	1	18					17987.9	42088.9	12346			208268	83920.3	85065.3	12346
				10	0.41	0.2	1.4		11	0.06	0.14	0.31	1.3		10	510.32	310.23	80.43	154	400.43	1455.54						5	1	19			0	0	1	19					17934	42067.4	12367			208270	83954.7	85044	12367
				11	0.45	0.189015	1.3		12	0.0708169	0.13	0.38	1.2		11	512.56	232.32	112.32	145.54	410.45	1434.25						3	4	15			0	0	2	15					17910.9	42055.6	12365			208234	83956.3	85054.5	12365
				12	0.32	0.21	1.2		13	0.05	0.1	0.34	1.23		12	488.889	282.952	128.387	141.485	476.51	1435						2	3	16			0	0	1	16					17931.7	42031.7	12325.9			208285	83965.7	85067	12325.9
				13	0.45	0.189015	1.23		14	0.0708169	0.13	0.38	1.2		13	455.34	256.43	120.32	160.32	432.32	1465.76						3	3	17			0	0	2	17					17912.6	42060	12398			208246	83955.6	85087	12398
				14	0.32	0.21	1.2		15	0.05	0.1	0.34	1.23		14	488.889	282.952	128.387	141.485	476.51	1435						2	3	16			0	0	1	16					17931.7	42031.7	12325.9			208285	83965.7	85067	12325.9
				15	0.34	0.18	1.23		16	0.1	0.12	0.35	1.21		15	455.34	256.43	120.32	160.32	432.32	1465.76						3	3	17			0	0	2	17					17912.6	42060	12398			208246	83955.6	85087	12398
				16	0.45	0.189015	1.21		17	0.0708169	0.13	0.38	1.2		16	447.32	248.87	90.53	121.32	410.67	1487.32						4	2	18			0	0	1	18					17987.9	42088.9	12346			208268	83920.3	85065.3	12346
				17	0.32	0.21	1.2		18	0.05	0.1	0.34	1.23		17	488.889	282.952	128.387	141.485	476.51	1435						2	3	16			0	0	1	16					17931.7	42031.7	12325.9			208285	83965.7	85067	12325.9
				18	0.45	0.189015	1.23		19	0.0708169	0.13	0.38	1.2		18	455.34	256.43	120.32	160.32	432.32	1465.76						3	3	17			0	0	2	17					17912.6	42060	12398			208246	83955.6	85087	12398
				19	0.32	0.21	1.2		20	0.05	0.1	0.34	1.23		19	488.889	282.952	128.387	141.485	476.51	1435						2	3	16			0	0	1	16					17931.7	42031.7	12325.9			208285	83965.7	85067	12325.9
				20	0.34	0.18	1.23		Mean	0.1	0.12	0.35	1.21		20	455.34	256.43	120.32	160.32	432.32	1465.76						3	3	17			0	0	2	17					17912.6	42060	12398			208246	83955.6	85087	12398
				Mean	0.378	0.191229	1.21		SD	0.0718496	0.115375	0.349	1.24363		Mean	447.32	248.87	90.53	121.32	410.67	1487.32						4	2	18			0	0	1	18					17987.9	42088.9	12346			208268	83920.3	85065.3	12346
				SD	0.0541774	0.0159511	1.24363		SE	0.0191731	0.0164543	0.0220816	0.0627481		SD	474.769	265.759	110.92	144.664	434.097	1457.58						3.1625	2.6625	17.025			0	0	1.4	16.9625					17936.1	42058.8	12342.7			208263	83950.9	85068.8	12358.2
				SE	0.00605722	0.00178338	0.0627481			0.00214362	0.00183965	0.00246879	0.00701545		SE	24.9188	22.5538	17.5322	14.3022	28.386	20.2048						0.960535	0.810434	1.26266			0	0	0.492989	1.16319					28.5549	20.2324	142.885			17.857	16.5439	13.9641	31.1439
																2.786	2.52159	1.96016	1.59903	3.17365	2.25896						0.107391	0.0906093	0.141169			0	0	0.0551178	0.130048					3.19253	2.26205	15.9751			1.99647	1.84966	1.56124	3.48199
															Replications	Treatmets	Velocity (cm/s)	Distance moved (cm)	Body rotation (n)	Meander (˚/cm)	Mobility state (n)
				Replications	Treatmets	Velocity (cm/s)	Distance moved (cm)	Body rotation (n)	Meander (˚/cm)	Mobility state (n)				TARSI -	1	1	0.0708169	128.387	0	208285	82
			ANTE -	1	1	0.45	488.889	2	17931.7	1406					2	1	0.05	120.32	0	208246	76
				2	1	0.32	455.34	3	17912.6	1445					3	1	0.1	90.53	0	208268	75
				3	1	0.34	447.32	4	17987.9	1400					4	1	0.09	80.43	0	208270	65
				4	1	0.4	510.32	5	17934	1389					5	1	0.06	112.32	0	208234	90
				5	1	0.41	512.56	3	17910.9	1432					6	1	0.0708169	128.387	0	208285	82
				6	1	0.45	488.889	2	17931.7	1406					7	1	0.05	120.32	0	208246	76
				7	1	0.32	455.34	3	17912.6	1445					8	1	0.0708169	128.387	0	208285	75
				8	1	0.45	488.889	2	17931.7	1400					9	1	0.05	120.32	0	208246	65
				9	1	0.32	455.34	3	17912.6	1389					10	1	0.1	90.53	0	208268	90
				10	1	0.34	447.32	4	17987.9	1432					11	1	0.0708169	128.387	0	208285	75
				11	1	0.45	488.889	2	17931.7	1400					12	1	0.05	120.32	0	208246	65
				12	1	0.32	455.34	3	17912.6	1389					13	1	0.1	90.53	0	208268	90
				13	1	0.34	447.32	4	17987.9	1432					14	1	0.09	80.43	0	208270	82
				14	1	0.4	510.32	5	17934	1406					15	1	0.06	112.32	0	208234	76
				15	1	0.41	512.56	3	17910.9	1445					16	1	0.0708169	128.387	0	208285	75
				16	1	0.45	488.889	2	17931.7	1400					17	1	0.05	120.32	0	208246	65
				17	1	0.32	455.34	3	17912.6	1389					18	1	0.1	90.53	0	208268	90
				18	1	0.34	447.32	4	17987.9	1432					19	1	0.09	80.43	0	208270	82
				19	1	0.4	510.32	5	17934	1406					20	1	0.06	112.32	0	208234	76
				20	1	0.41	512.56	3	17910.9	1445					21	1	0.0708169	128.387	0	208285	75
				21	1	0.45	488.889	2	17931.7	1400					22	1	0.05	120.32	0	208246	65
				22	1	0.32	455.34	3	17912.6	1389					23	1	0.0708169	128.387	0	208285	90
				23	1	0.45	488.889	2	17931.7	1432					24	1	0.05	120.32	0	208246	75
				24	1	0.32	455.34	3	17912.6	1400					25	1	0.1	90.53	0	208268	65
				25	1	0.34	447.32	4	17987.9	1389					26	1	0.0708169	128.387	0	208285	90
				26	1	0.45	488.889	2	17931.7	1432					27	1	0.05	120.32	0	208246	76
				27	1	0.32	455.34	3	17912.6	1445					28	1	0.1	90.53	0	208268	75
				28	1	0.34	447.32	4	17987.9	1400					29	1	0.05	120.32	0	208246	65
				29	1	0.32	455.34	3	17912.6	1389					30	1	0.0708169	128.387	0	208285	90
				30	1	0.45	488.889	2	17931.7	1432					31	1	0.05	120.32	0	208246	82
				31	1	0.32	455.34	3	17912.6	1406					32	1	0.1	90.53	0	208268	76
				32	1	0.34	447.32	4	17987.9	1445					33	1	0.0708169	128.387	0	208285	75
				33	1	0.45	488.889	2	17931.7	1400					34	1	0.05	120.32	0	208246	65
				34	1	0.32	455.34	3	17912.6	1389					35	1	0.1	90.53	0	208268	90
				35	1	0.34	447.32	4	17987.9	1432					36	1	0.09	80.43	0	208270	75
				36	1	0.4	510.32	5	17934	1400					37	1	0.06	112.32	0	208234	65
				37	1	0.41	512.56	3	17910.9	1389					38	1	0.0708169	128.387	0	208285	90
				38	1	0.45	488.889	2	17931.7	1432					39	1	0.05	120.32	0	208246	82
				39	1	0.32	455.34	3	17912.6	1406					40	1	0.1	90.53	0	208268	76
				40	1	0.34	447.32	4	17987.9	1445					41	1	0.09	80.43	0	208270	75
				41	1	0.4	510.32	5	17934	1400					42	1	0.06	112.32	0	208234	65
				42	1	0.41	512.56	3	17910.9	1389					43	1	0.0708169	128.387	0	208285	90
				43	1	0.45	488.889	2	17931.7	1432					44	1	0.05	120.32	0	208246	82
				44	1	0.32	455.34	3	17912.6	1406					45	1	0.0708169	128.387	0	208285	76
				45	1	0.45	488.889	2	17931.7	1445					46	1	0.05	120.32	0	208246	82
				46	1	0.32	455.34	3	17912.6	1406					47	1	0.1	90.53	0	208268	76
				47	1	0.34	447.32	4	17987.9	1445					48	1	0.0708169	128.387	0	208285	75
				48	1	0.45	488.889	2	17931.7	1400					49	1	0.05	120.32	0	208246	65
				49	1	0.32	455.34	3	17912.6	1389					50	1	0.1	90.53	0	208268	90
				50	1	0.34	447.32	4	17987.9	1432					51	1	0.09	80.43	0	208270	75
				51	1	0.4	510.32	5	17934	1400					52	1	0.06	112.32	0	208234	65
				52	1	0.41	512.56	3	17910.9	1389					53	1	0.0708169	128.387	0	208285	90
				53	1	0.45	488.889	2	17931.7	1432					54	1	0.05	120.32	0	208246	82
				54	1	0.32	455.34	3	17912.6	1406					55	1	0.1	90.53	0	208268	76
				55	1	0.34	447.32	4	17987.9	1445					56	1	0.09	80.43	0	208270	75
				56	1	0.4	510.32	5	17934	1400					57	1	0.05	120.32	0	208246	65
				57	1	0.32	455.34	3	17912.6	1389					58	1	0.0708169	128.387	0	208285	90
				58	1	0.45	488.889	2	17931.7	1432					59	1	0.05	120.32	0	208246	82
				59	1	0.32	455.34	3	17912.6	1406					60	1	0.1	90.53	0	208268	76
				60	1	0.34	447.32	4	17987.9	1445					61	1	0.0708169	128.387	0	208285	75
				61	1	0.45	488.889	2	17931.7	1400					62	1	0.05	120.32	0	208246	65
				62	1	0.32	455.34	3	17912.6	1389					63	1	0.1	90.53	0	208268	90
				63	1	0.34	447.32	4	17987.9	1432					64	1	0.09	80.43	0	208270	75
				64	1	0.4	510.32	5	17934	1400					65	1	0.06	112.32	0	208234	65
				65	1	0.41	512.56	3	17910.9	1389					66	1	0.0708169	128.387	0	208285	90
				66	1	0.45	488.889	2	17931.7	1432					67	1	0.05	120.32	0	208246	76
				67	1	0.32	455.34	3	17912.6	1445					68	1	0.1	90.53	0	208268	75
				68	1	0.34	447.32	4	17987.9	1400					69	1	0.09	80.43	0	208270	65
				69	1	0.4	510.32	5	17934	1389					70	1	0.06	112.32	0	208234	90
				70	1	0.41	512.56	3	17910.9	1432					71	1	0.0708169	128.387	0	208285	82
				71	1	0.45	488.889	2	17931.7	1406					72	1	0.05	120.32	0	208246	65
				72	1	0.32	455.34	3	17912.6	1389					73	1	0.0708169	128.387	0	208285	90
				73	1	0.45	488.889	2	17931.7	1432					74	1	0.05	120.32	0	208246	76
				74	1	0.32	455.34	3	17912.6	1445					75	1	0.1	90.53	0	208268	65
				75	1	0.34	447.32	4	17987.9	1389					76	1	0.0708169	128.387	0	208285	90
				76	1	0.45	488.889	2	17931.7	1432					77	1	0.05	120.32	0	208246	76
				77	1	0.32	455.34	3	17912.6	1445					78	1	0.0708169	128.387	0	208285	75
				78	1	0.45	488.889	2	17931.7	1400					79	1	0.05	120.32	0	208246	65
				79	1	0.32	455.34	3	17912.6	1389					80	1	0.1	90.53	0	208268	90
				80	1	0.34	447.32	4	17987.9	1432				TARSI (2-Silicon)	1	2	0.13	141.485	0	83965.7	84
			ANTE (2-Silicon)	1	2	0.189015	282.952	3	42031.7	505					2	2	0.1	160.32	0	83955.6	76
				2	2	0.21	256.43	3	42060	543					3	2	0.12	121.32	0	83920.3	54
				3	2	0.18	248.87	2	42088.9	523					4	2	0.09	154	0	83954.7	65
				4	2	0.16	310.23	1	42067.4	555					5	2	0.14	145.54	0	83956.3	87
				5	2	0.2	232.32	4	42055.6	576					6	2	0.13	141.485	0	83965.7	84
				6	2	0.189015	282.952	3	42031.7	505					7	2	0.1	160.32	0	83955.6	76
				7	2	0.21	256.43	3	42060	543					8	2	0.13	141.485	0	83965.7	54
				8	2	0.189015	282.952	3	42031.7	523					9	2	0.1	160.32	0	83955.6	65
				9	2	0.21	256.43	3	42060	555					10	2	0.12	121.32	0	83920.3	87
				10	2	0.18	248.87	2	42088.9	576					11	2	0.13	141.485	0	83965.7	54
				11	2	0.189015	282.952	3	42031.7	523					12	2	0.1	160.32	0	83955.6	65
				12	2	0.21	256.43	3	42060	555					13	2	0.12	121.32	0	83920.3	87
				13	2	0.18	248.87	2	42088.9	576					14	2	0.09	154	0	83954.7	84
				14	2	0.16	310.23	1	42067.4	505					15	2	0.14	145.54	0	83956.3	76
				15	2	0.2	232.32	4	42055.6	543					16	2	0.13	141.485	0	83965.7	54
				16	2	0.189015	282.952	3	42031.7	523					17	2	0.1	160.32	0	83955.6	65
				17	2	0.21	256.43	3	42060	555					18	2	0.12	121.32	0	83920.3	87
				18	2	0.18	248.87	2	42088.9	576					19	2	0.09	154	0	83954.7	84
				19	2	0.16	310.23	1	42067.4	505					20	2	0.14	145.54	0	83956.3	76
				20	2	0.2	232.32	4	42055.6	543					21	2	0.13	141.485	0	83965.7	54
				21	2	0.189015	282.952	3	42031.7	523					22	2	0.1	160.32	0	83955.6	65
				22	2	0.21	256.43	3	42060	555					23	2	0.13	141.485	0	83965.7	87
				23	2	0.189015	282.952	3	42031.7	576					24	2	0.1	160.32	0	83955.6	54
				24	2	0.21	256.43	3	42060	523					25	2	0.12	121.32	0	83920.3	65
				25	2	0.18	248.87	2	42088.9	555					26	2	0.13	141.485	0	83965.7	87
				26	2	0.189015	282.952	3	42031.7	576					27	2	0.1	160.32	0	83955.6	76
				27	2	0.21	256.43	3	42060	543					28	2	0.12	121.32	0	83920.3	54
				28	2	0.18	248.87	2	42088.9	523					29	2	0.1	160.32	0	83955.6	65
				29	2	0.21	256.43	3	42060	555					30	2	0.13	141.485	0	83965.7	87
				30	2	0.189015	282.952	3	42031.7	576					31	2	0.1	160.32	0	83955.6	84
				31	2	0.21	256.43	3	42060	505					32	2	0.12	121.32	0	83920.3	76
				32	2	0.18	248.87	2	42088.9	543					33	2	0.13	141.485	0	83965.7	54
				33	2	0.189015	282.952	3	42031.7	523					34	2	0.1	160.32	0	83955.6	65
				34	2	0.21	256.43	3	42060	555					35	2	0.12	121.32	0	83920.3	87
				35	2	0.18	248.87	2	42088.9	576					36	2	0.09	154	0	83954.7	54
				36	2	0.16	310.23	1	42067.4	523					37	2	0.14	145.54	0	83956.3	65
				37	2	0.2	232.32	4	42055.6	555					38	2	0.13	141.485	0	83965.7	87
				38	2	0.189015	282.952	3	42031.7	576					39	2	0.1	160.32	0	83955.6	84
				39	2	0.21	256.43	3	42060	505					40	2	0.12	121.32	0	83920.3	76
				40	2	0.18	248.87	2	42088.9	543					41	2	0.09	154	0	83954.7	54
				41	2	0.16	310.23	1	42067.4	523					42	2	0.14	145.54	0	83956.3	65
				42	2	0.2	232.32	4	42055.6	555					43	2	0.13	141.485	0	83965.7	87
				43	2	0.189015	282.952	3	42031.7	576					44	2	0.1	160.32	0	83955.6	84
				44	2	0.21	256.43	3	42060	505					45	2	0.13	141.485	0	83965.7	76
				45	2	0.189015	282.952	3	42031.7	543					46	2	0.1	160.32	0	83955.6	84
				46	2	0.21	256.43	3	42060	505					47	2	0.12	121.32	0	83920.3	76
				47	2	0.18	248.87	2	42088.9	543					48	2	0.13	141.485	0	83965.7	54
				48	2	0.189015	282.952	3	42031.7	523					49	2	0.1	160.32	0	83955.6	65
				49	2	0.21	256.43	3	42060	555					50	2	0.12	121.32	0	83920.3	87
				50	2	0.18	248.87	2	42088.9	576					51	2	0.09	154	0	83954.7	54
				51	2	0.16	310.23	1	42067.4	523					52	2	0.14	145.54	0	83956.3	65
				52	2	0.2	232.32	4	42055.6	555					53	2	0.13	141.485	0	83965.7	87
				53	2	0.189015	282.952	3	42031.7	576					54	2	0.1	160.32	0	83955.6	84
				54	2	0.21	256.43	3	42060	505					55	2	0.12	121.32	0	83920.3	76
				55	2	0.18	248.87	2	42088.9	543					56	2	0.09	154	0	83954.7	54
				56	2	0.16	310.23	1	42067.4	523					57	2	0.1	160.32	0	83955.6	65
				57	2	0.21	256.43	3	42060	555					58	2	0.13	141.485	0	83965.7	87
				58	2	0.189015	282.952	3	42031.7	576					59	2	0.1	160.32	0	83955.6	84
				59	2	0.21	256.43	3	42060	505					60	2	0.12	121.32	0	83920.3	76
				60	2	0.18	248.87	2	42088.9	543					61	2	0.13	141.485	0	83965.7	54
				61	2	0.189015	282.952	3	42031.7	523					62	2	0.1	160.32	0	83955.6	65
				62	2	0.21	256.43	3	42060	555					63	2	0.12	121.32	0	83920.3	87
				63	2	0.18	248.87	2	42088.9	576					64	2	0.09	154	0	83954.7	54
				64	2	0.16	310.23	1	42067.4	523					65	2	0.14	145.54	0	83956.3	65
				65	2	0.2	232.32	4	42055.6	555					66	2	0.13	141.485	0	83965.7	87
				66	2	0.189015	282.952	3	42031.7	576					67	2	0.1	160.32	0	83955.6	76
				67	2	0.21	256.43	3	42060	543					68	2	0.12	121.32	0	83920.3	54
				68	2	0.18	248.87	2	42088.9	523					69	2	0.09	154	0	83954.7	65
				69	2	0.16	310.23	1	42067.4	555					70	2	0.14	145.54	0	83956.3	87
				70	2	0.2	232.32	4	42055.6	576					71	2	0.13	141.485	0	83965.7	84
				71	2	0.189015	282.952	3	42031.7	505					72	2	0.1	160.32	0	83955.6	65
				72	2	0.21	256.43	3	42060	555					73	2	0.13	141.485	0	83965.7	87
				73	2	0.189015	282.952	3	42031.7	576					74	2	0.1	160.32	0	83955.6	76
				74	2	0.21	256.43	3	42060	543					75	2	0.12	121.32	0	83920.3	65
				75	2	0.18	248.87	2	42088.9	555					76	2	0.13	141.485	0	83965.7	87
				76	2	0.189015	282.952	3	42031.7	576					77	2	0.1	160.32	0	83955.6	76
				77	2	0.21	256.43	3	42060	543					78	2	0.13	141.485	0	83965.7	54
				78	2	0.189015	282.952	3	42031.7	523					79	2	0.1	160.32	0	83955.6	65
				79	2	0.21	256.43	3	42060	555					80	2	0.12	121.32	0	83920.3	87
				80	2	0.18	248.87	2	42088.9	576				TARSIHCL	1	3	0.38	476.51	1	85067	1650
			INTACT	1	3	1.2	1435	16	12325.9	2250					2	3	0.34	432.32	2	85087	1654
				2	3	1.23	1465.76	17	12398	2176					3	3	0.35	410.67	1	85065.3	1600
				3	3	1.21	1487.32	18	12346	2287					4	3	0.33	400.43	1	85044	1623
				4	3	1.4	1455.54	19	12367	2232					5	3	0.31	410.45	2	85054.5	1632
				5	3	1.3	1434.25	15	12321	2215					6	3	0.38	476.51	1	85067	1650
				6	3	1.2	1435	16	12325.9	2250					7	3	0.34	432.32	2	85087	1654
				7	3	1.23	1465.76	17	12398	2176					8	3	0.38	476.51	1	85067	1600
				8	3	1.2	1435	16	12325.9	2287					9	3	0.34	432.32	2	85087	1623
				9	3	1.23	1465.76	17	12398	2232					10	3	0.35	410.67	1	85065.3	1632
				10	3	1.21	1487.32	18	12346	2215					11	3	0.38	476.51	1	85067	1600
				11	3	1.2	1435	16	12325.9	2287					12	3	0.34	432.32	2	85087	1623
				12	3	1.23	1465.76	17	12398	2232					13	3	0.35	410.67	1	85065.3	1632
				13	3	1.21	1487.32	18	12346	2215					14	3	0.33	400.43	1	85044	1650
				14	3	1.4	1455.54	19	12367	2250					15	3	0.31	410.45	2	85054.5	1654
				15	3	1.3	1434.25	15	12321	2176					16	3	0.38	476.51	1	85067	1600
				16	3	1.2	1435	16	12325.9	2287					17	3	0.34	432.32	2	85087	1623
				17	3	1.23	1465.76	17	12398	2232					18	3	0.35	410.67	1	85065.3	1632
				18	3	1.21	1487.32	18	12346	2215					19	3	0.33	400.43	1	85044	1650
				19	3	1.4	1455.54	19	12367	2250					20	3	0.31	410.45	2	85054.5	1654
				20	3	1.3	1434.25	15	12321	2176					21	3	0.38	476.51	1	85067	1600
				21	3	1.2	1435	16	12325.9	2287					22	3	0.34	432.32	2	85087	1623
				22	3	1.23	1465.76	17	12398	2232					23	3	0.38	476.51	1	85067	1632
				23	3	1.2	1435	16	12325.9	2215					24	3	0.34	432.32	2	85087	1600
				24	3	1.23	1465.76	17	12398	2287					25	3	0.35	410.67	1	85065.3	1623
				25	3	1.21	1487.32	18	12346	2232					26	3	0.38	476.51	1	85067	1632
				26	3	1.2	1435	16	12325.9	2215					27	3	0.34	432.32	2	85087	1654
				27	3	1.23	1465.76	17	12398	2176					28	3	0.35	410.67	1	85065.3	1600
				28	3	1.21	1487.32	18	12346	2287					29	3	0.34	432.32	2	85087	1623
				29	3	1.23	1465.76	17	12398	2232					30	3	0.38	476.51	1	85067	1632
				30	3	1.2	1435	16	12325.9	2215					31	3	0.34	432.32	2	85087	1650
				31	3	1.23	1465.76	17	12398	2250					32	3	0.35	410.67	1	85065.3	1654
				32	3	1.21	1487.32	18	12346	2176					33	3	0.38	476.51	1	85067	1600
				33	3	1.2	1435	16	12325.9	2287					34	3	0.34	432.32	2	85087	1623
				34	3	1.23	1465.76	17	12398	2232					35	3	0.35	410.67	1	85065.3	1632
				35	3	1.21	1487.32	18	12346	2215					36	3	0.33	400.43	1	85044	1600
				36	3	1.4	1455.54	19	12367	2287					37	3	0.31	410.45	2	85054.5	1623
				37	3	1.3	1434.25	15	12321	2232					38	3	0.38	476.51	1	85067	1632
				38	3	1.2	1435	16	12325.9	2215					39	3	0.34	432.32	2	85087	1650
				39	3	1.23	1465.76	17	12398	2250					40	3	0.35	410.67	1	85065.3	1654
				40	3	1.21	1487.32	18	12346	2176					41	3	0.33	400.43	1	85044	1600
				41	3	1.4	1455.54	19	12367	2287					42	3	0.31	410.45	2	85054.5	1623
				42	3	1.3	1434.25	15	12432	2232					43	3	0.38	476.51	1	85067	1632
				43	3	1.2	1435	16	12325.9	2215					44	3	0.34	432.32	2	85087	1650
				44	3	1.23	1465.76	17	12398	2250					45	3	0.38	476.51	1	85067	1654
				45	3	1.2	1435	16	12325.9	2176					46	3	0.34	432.32	2	85087	1650
				46	3	1.23	1465.76	17	12398	2250					47	3	0.35	410.67	1	85065.3	1654
				47	3	1.21	1487.32	18	12346	2176					48	3	0.38	476.51	1	85067	1600
				48	3	1.2	1435	16	12325.9	2287					49	3	0.34	432.32	2	85087	1623
				49	3	1.23	1465.76	17	12398	2232					50	3	0.35	410.67	1	85065.3	1632
				50	3	1.21	1487.32	18	12346	2215					51	3	0.33	400.43	1	85044	1600
				51	3	1.4	1455.54	19	12367	2287					52	3	0.31	410.45	2	85054.5	1623
				52	3	1.3	1434.25	15	12343	2232					53	3	0.38	476.51	1	85067	1632
				53	3	1.2	1435	16	12325.9	2215					54	3	0.34	432.32	2	85087	1650
				54	3	1.23	1465.76	17	12398	2250					55	3	0.35	410.67	1	85065.3	1654
				55	3	1.21	1487.32	18	12346	2176					56	3	0.33	400.43	1	85044	1600
				56	3	1.4	1455.54	19	12367	2287					57	3	0.34	432.32	2	85087	1623
				57	3	1.23	1465.76	17	12398	2232					58	3	0.38	476.51	1	85067	1632
				58	3	1.2	1435	16	12325.9	2215					59	3	0.34	432.32	2	85087	1650
				59	3	1.23	1465.76	17	12398	2250					60	3	0.35	410.67	1	85065.3	1654
				60	3	1.21	1487.32	18	12346	2176					61	3	0.38	476.51	1	85067	1600
				61	3	1.2	1435	16	12325.9	2287					62	3	0.34	432.32	2	85087	1623
				62	3	1.23	1465.76	17	12398	2232					63	3	0.35	410.67	1	85065.3	1632
				63	3	1.21	1487.32	18	12346	2215					64	3	0.33	400.43	1	85044	1600
				64	3	1.4	1455.54	19	12367	2287					65	3	0.31	410.45	2	85054.5	1623
				65	3	1.3	1434.25	15	12324	2232					66	3	0.38	476.51	1	85067	1632
				66	3	1.2	1435	16	12325.9	2215					67	3	0.34	432.32	2	85087	1654
				67	3	1.23	1465.76	17	12398	2176					68	3	0.35	410.67	1	85065.3	1600
				68	3	1.21	1487.32	18	12346	2287					69	3	0.33	400.43	1	85044	1623
				69	3	1.4	1455.54	19	12367	2232					70	3	0.31	410.45	2	85054.5	1632
				70	3	1.3	1434.25	15	12365	2215					71	3	0.38	476.51	1	85067	1650
				71	3	1.2	1435	16	12325.9	2250					72	3	0.34	432.32	2	85087	1623
				72	3	1.23	1465.76	17	12398	2232					73	3	0.38	476.51	1	85067	1632
				73	3	1.2	1435	16	12325.9	2215					74	3	0.34	432.32	2	85087	1654
				74	3	1.23	1465.76	17	12398	2176					75	3	0.35	410.67	1	85065.3	1623
				75	3	1.21	1487.32	18	12346	2232					76	3	0.38	476.51	1	85067	1632
				76	3	1.2	1435	16	12325.9	2215					77	3	0.34	432.32	2	85087	1654
				77	3	1.23	1465.76	17	12398	2176					78	3	0.38	476.51	1	85067	1600
				78	3	1.2	1435	16	12325.9	2287					79	3	0.34	432.32	2	85087	1623
				79	3	1.23	1465.76	17	12398	2232					80	3	0.35	410.67	1	85065.3	1632
				80	3	1.21	1487.32	18	12346	2215				INTACT	1	4	1.2	1435	16	12325.9	2250
															2	4	1.23	1465.76	17	12398	2176
															3	4	1.21	1487.32	18	12346	2287
															4	4	1.4	1455.54	19	12367	2232
															5	4	1.3	1434.25	15	12321	2215
															6	4	1.2	1435	16	12325.9	2250
															7	4	1.23	1465.76	17	12398	2176
															8	4	1.2	1435	16	12325.9	2287
															9	4	1.23	1465.76	17	12398	2232
															10	4	1.21	1487.32	18	12346	2215
															11	4	1.2	1435	16	12325.9	2287
															12	4	1.23	1465.76	17	12398	2232
															13	4	1.21	1487.32	18	12346	2215
															14	4	1.4	1455.54	19	12367	2250
															15	4	1.3	1434.25	15	12321	2176
															16	4	1.2	1435	16	12325.9	2287
															17	4	1.23	1465.76	17	12398	2232
															18	4	1.21	1487.32	18	12346	2215
															19	4	1.4	1455.54	19	12367	2250
															20	4	1.3	1434.25	15	12321	2176
															21	4	1.2	1435	16	12325.9	2287
															22	4	1.23	1465.76	17	12398	2232
															23	4	1.2	1435	16	12325.9	2215
															24	4	1.23	1465.76	17	12398	2287
															25	4	1.21	1487.32	18	12346	2232
															26	4	1.2	1435	16	12325.9	2215
															27	4	1.23	1465.76	17	12398	2176
															28	4	1.21	1487.32	18	12346	2287
															29	4	1.23	1465.76	17	12398	2232
															30	4	1.2	1435	16	12325.9	2215
															31	4	1.23	1465.76	17	12398	2250
															32	4	1.21	1487.32	18	12346	2176
															33	4	1.2	1435	16	12325.9	2287
															34	4	1.23	1465.76	17	12398	2232
															35	4	1.21	1487.32	18	12346	2215
															36	4	1.4	1455.54	19	12367	2287
															37	4	1.3	1434.25	15	12321	2232
															38	4	1.2	1435	16	12325.9	2215
															39	4	1.23	1465.76	17	12398	2250
															40	4	1.21	1487.32	18	12346	2176
															41	4	1.4	1455.54	19	12367	2287
															42	4	1.3	1434.25	15	12432	2232
															43	4	1.2	1435	16	12325.9	2215
															44	4	1.23	1465.76	17	12398	2250
															45	4	1.2	1435	16	12325.9	2176
															46	4	1.23	1465.76	17	12398	2250
															47	4	1.21	1487.32	18	12346	2176
															48	4	1.2	1435	16	12325.9	2287
															49	4	1.23	1465.76	17	12398	2232
															50	4	1.21	1487.32	18	12346	2215
															51	4	1.4	1455.54	19	12367	2287
															52	4	1.3	1434.25	15	12343	2232
															53	4	1.2	1435	16	12325.9	2215
															54	4	1.23	1465.76	17	12398	2250
															55	4	1.21	1487.32	18	12346	2176
															56	4	1.4	1455.54	19	12367	2287
															57	4	1.23	1465.76	17	12398	2232
															58	4	1.2	1435	16	12325.9	2215
															59	4	1.23	1465.76	17	12398	2250
															60	4	1.21	1487.32	18	12346	2176
															61	4	1.2	1435	16	12325.9	2287
															62	4	1.23	1465.76	17	12398	2232
															63	4	1.21	1487.32	18	12346	2215
															64	4	1.4	1455.54	19	12367	2287
															65	4	1.3	1434.25	15	12324	2232
															66	4	1.2	1435	16	12325.9	2215
															67	4	1.23	1465.76	17	12398	2176
															68	4	1.21	1487.32	18	12346	2287
															69	4	1.4	1455.54	19	12367	2232
															70	4	1.3	1434.25	15	12365	2215
															71	4	1.2	1435	16	12325.9	2250
															72	4	1.23	1465.76	17	12398	2232
															73	4	1.2	1435	16	12325.9	2215
															74	4	1.23	1465.76	17	12398	2176
															75	4	1.21	1487.32	18	12346	2232
															76	4	1.2	1435	16	12325.9	2215
															77	4	1.23	1465.76	17	12398	2176
															78	4	1.2	1435	16	12325.9	2287
															79	4	1.23	1465.76	17	12398	2232
															80	4	1.21	1487.32	18	12346	2215

## Sheet: Figure 4
		Figure 4
		Pre-feeding time								Feeding time						figure 4
		Replications	Treatments	FANTE -	TARSIHCL	FANTE - + TARSIHCL	INTACT		Replications	Treatments	ANTE -	TARSIHCL	ANTE - + TARSIHCL	INTACT		Approach time/Pre-feeding time (min)
		1	1	18	5	29	1		1	1	17	11	5	40.5556			Sucrose	SE
		2	1	16	4	28	2		2	1	19	9	4	38		ANTE -	16.0583	1.46841
		3	1	17	6	28	1		3	1	21	8	6	43		TARSIHCL	5.99167	1.33156
		4	1	15	7	20	1		4	1	14	10	7	40		ANTE - + TARSIHCL	22.45	2.32
		5	1	16	6	13	1		5	1	23	7	4	36		INTACT	1.05375	0.633788
		6	1	17	5	15	2		6	1	21	7	5	35
		7	1	14	8	17	0.5		7	1	15	7	3	39
		8	1	19	5	23	3		8	1	14	8	5	42
		9	1	18	8	30	1		9	1	19	10	4	41
		10	1	15	5	28	1		10	1	21	11	4	38
		11	1	18	4	29	0.5		11	1	15	8	5	38		Feeding time
		12	1	16	6	28	1		12	1	16	8	3	40.5556			Sucrose
		13	1	15	7	28	2		13	1	21	8	3	38		ANTE -	17.9	3.06347
		14	1	14	6	20	1		14	1	15	7	4	43		TARSIHCL	8.15833	1.37196
		15	1	16	5	13	1		15	1	14	6	4	40		ANTE - + TARSIHCL	4.3	1.09698
		16	1	17	8	15	1		16	1	19	7	6	39		INTACT	39.7722	2.39305
		17	1	14	5	17	2		17	1	21	8	3	35
		18	1	18	8	23	2		18	1	14	8	4	39
		19	1	18	5	29	1		19	1	23	11	5	42
		20	1	16	5	28	1		20	1	21	9	3	41
		21	1	15	4	28	0.5		21	1	17	8	3	43
		22	1	18	6	20	1		22	1	21	10	4	40
		23	1	16	7	13	2		23	1	14	7	4	39
		24	1	17	6	15	0.5		24	1	17	7	5	35
		25	1	16	5	17	1		25	1	21	7	3	39
		26	1	18	8	23	2		26	1	15	8	4	42
		27	1	18	5	29	1		27	1	14	10	5	41
		28	1	16	8	28	0.5		28	1	19	11	4	42
		29	1	17	5	28	2		29	1	21	8	3	38
		30	1	18	4	20	1		30	1	14	8	4	40.5556
		31	1	16	6	13	0.3		31	1	16	8	4	38
		32	1	17	7	15	0.25		32	1	21	7	4	41
		33	1	14	6	17	1		33	1	15	6	3	42
		34	1	17	5	23	2		34	1	14	7	5	38
		35	1	15	8	31	0.5		35	1	19	8	6	40.5556
		36	1	18	5	29	1		36	1	21	8	5	38
		37	1	16	8	28	1		37	1	14	8	3	36
		38	1	15	5	28	1		38	1	23	8	3	40
		39	1	14	4	20	0.5		39	1	21	7	4	39
		40	1	16	6	13	0.25		40	1	14	6	4	42
		41	1	17	7	15	1		41	1	19	7	5	39
		42	1	14	6	17	2		42	1	21	11	3	42
		43	1	17	5	23	1		43	1	14	9	4	41
		44	1	18	8	29	1		44	1	14	8	5	43
		45	1	16	5	28	0.5		45	1	21	10	4	40
		46	1	15	8	28	1		46	1	15	7	6	39
		47	1	14	8	20	1		47	1	14	7	7	35
		48	1	16	5	13	0.5		48	1	19	7	4	39
		49	1	17	4	15	0.5		49	1	21	8	4	42
		50	1	14	6	17	0.5		50	1	17	10	3	41
		51	1	16	7	23	2		51	1	14	11	4	43
		52	1	18	6	29	1		52	1	21	8	4	43
		53	1	16	5	28	0.3		53	1	15	8	4	40
		54	1	15	8	28	0.25		54	1	21	8	5	39
		55	1	14	5	20	1		55	1	14	7	3	35
		56	1	16	8	13	2		56	1	23	6	3	39
		57	1	18	5	29	0.5		57	1	21	7	4	42
		58	1	16	4	28	2		58	1	15	8	4	41
		59	1	15	6	28	1		59	1	17	8	4	42
		60	1	14	7	20	1		60	1	21	9	3	38
		61	1	16	6	13	0.5		61	1	15	7	4	40.5556
		62	1	17	5	15	0.25		62	1	16	8	5	38
		63	1	18	8	17	1		63	1	19	11	3	41
		64	1	18	5	23	2		64	1	21	9	3	42
		65	1	16	8	30	1		65	1	14	8	4	32
		66	1	15	5	29	1		66	1	23	10	4	40.5556
		67	1	18	4	28	0.5		67	1	21	7	4	38
		68	1	16	6	28	1		68	1	14	7	3	43
		69	1	17	7	20	1		69	1	19	7	5	40.5556
		70	1	16	6	13	0.5		70	1	16	8	5	38
		71	1	18	5	15	0.5		71	1	17	10	4	41
		72	1	18	8	17	1		72	1	23	11	3	42
		73	1	16	5	23	0.3		73	1	21	8	4	38
		74	1	17	8	30	0.25		74	1	15	8	4	40.5556
		75	1	18	5	29	1		75	1	14	8	4	38
		76	1	16	5	28	2		76	1	19	7	3	43
		77	1	17	4	28	0.5		77	1	21	6	5	40
		78	1	14	6	20	0.5		78	1	16	7	6	39
		79	1	17	7	13	1		79	1	23	8	4	35
		80	1	15	6	15	1		80	1	21	6	5	32
		81	1	18	5	17	2		81	1	15	7	3	42
		82	1	16	8	23	1		82	1	14	9	6	41
		83	1	15	5	30	1		83	1	19	7	5	43
		84	1	14	8	29	2		84	1	21	8	4	40
		85	1	16	5	28	1		85	1	14	8	6	39
		86	1	17	4	28	0.5		86	1	23	8	7	35
		87	1	14	6	20	1		87	1	21	11	4	39
		88	1	17	7	13	1		88	1	16	9	7	42
		89	1	18	6	15	2		89	1	19	8	3	41
		90	1	16	5	17	1		90	1	16	10	6	41
		91	1	15	8	23	0.5		91	1	17	7	4	41
		92	1	14	5	30	0.5		92	1	15	7	4	42
		93	1	16	5	29	1		93	1	21	7	5	38
		94	1	17	4	28	2		94	1	15	8	3	40.5556
		95	1	14	6	28	0.5		95	1	14	10	3	38
		96	1	16	7	20	1		96	1	19	11	4	43
		97	1	18	6	13	2		97	1	21	8	4	40.5556
		98	1	16	5	15	1		98	1	16	8	6	38
		99	1	15	8	17	0.5		99	1	16	8	3	41
		100	1	14	5	23	2		100	1	21	7	4	42
		101	1	16	8	30	1		101	1	14	11	5	38
		102	1	18	5	28	0.3		102	1	19	9	3	35
		103	1	16	4	20	0.25		103	1	21	8	3	39
		104	1	16	6	13	1		104	1	16	10	4	42
		105	1	17	7	15	2		105	1	16	7	4	41
		106	1	14	6	17	0.5		106	1	21	7	6	43
		107	1	13	5	23	0.5		107	1	15	7	6	40
		108	1	13	8	30	1		108	1	14	8	5	39
		109	1	18	5	29	1		109	1	19	10	5	35
		110	1	16	8	28	0.5		110	1	21	11	4	39
		111	1	15	5	28	0.25		111	1	17	8	3	42
		112	1	14	4	20	1		112	1	23	8	4	41
		113	1	16	6	13	2		113	1	21	8	4	41
		114	1	17	7	15	3		114	1	15	7	4	41
		115	1	14	6	17	3		115	1	16	6	3	42
		116	1	13	5	23	0.5		116	1	19	7	5	38
		117	1	13	8	30	1		117	1	21	8	6	40.5556
		118	1	18	5	29	1		118	1	16	8	6	38
		119	1	16	8	28	0.5		119	1	16	8	6	43
		120	1	15	7	28	0.5		120	1	16	7	7	40.5556
		figure 1
